# Supplementary material for: Hexamethylenetetramine carboxyborane: synthesis, structural characterization and CO releasing properties
Source: Royal Society of Chemistry journal article supplement (doi:10.1039/c6dt03856e), 2016-12-12
Supplement: c6dt03856e1.pdf [file c6dt03856e1.pdf]

## Hexamethylenetetramine carboxyborane: synthesis, structural characterization and CO releasing property

T. I. Ayudhya<sup>a</sup>, C. C. Raymond<sup>b</sup>, N. N. Dingra<sup>a,†</sup>

<sup>a</sup> School of Pure and Applied Sciences, Florida SouthWestern State College, Fort Myers FL 33919, USA

<sup>b</sup> Chemistry Department, State University of New York at Oswego, Oswego NY 13126, USA

<sup>†</sup> Email: [ndingra@fsw.edu](mailto:ndingra@fsw.edu)

### Supporting Information

#### Table of Contents

| Contents                                                                         | Page    |
|----------------------------------------------------------------------------------|---------|
| Table of Contents                                                                | S1      |
| Calculation: Percent CO released calculated from myoglobin assay <sup>§</sup>    | S2-S3   |
| Calculation: Percent CO released calculated from <sup>1</sup> H NMR <sup>§</sup> | S4      |
| Calculation: Percent CO released calculated from meter readings <sup>§</sup>     | S5      |
| NMR Spectra of HMTA-CB in DMSO                                                   | S6-S8   |
| NMR Spectra of HMTA-CB in D <sub>2</sub> O                                       | S9-S11  |
| IR Spectra                                                                       | S12     |
| Hi-res Mass Spectrum                                                             | S13     |
| Elemental Analysis                                                               | S14     |
| <sup>1</sup> H NMR Spectra of HMTA-CB Decomposition                              | S15-S17 |
| <sup>13</sup> C NMR Spectra of HMTA-CB Decomposition                             | S18-S20 |
| <sup>11</sup> B NMR Spectra of HMTA-CB Decomposition                             | S21-S23 |
| Overlaid <sup>1</sup> H NMR Spectra of HMTA-CB Decomposition over 12 day period  | S24     |
| <sup>1</sup> H NMR Spectra of HMTA Stability Test <sup>§§</sup>                  | S25-S26 |
| <sup>13</sup> C NMR Spectra of HMTA Stability Test <sup>§§</sup>                 | S27-S28 |

§, §§ Notes from the main text.

## Calculation: Percent CO released calculated from myoglobin assay <sup>5</sup>

### Preparation of Deoxy-Myoglobin (deoxy-Mb):

Horse heart myoglobin (3.52 mg, 0.200  $\mu\text{mol}$ , MM 17000) was dissolved in 300  $\mu\text{L}$  sodium phosphate buffer (50 mM, pH 7.4). This was mixed with 30  $\mu\text{L}$  of 100 mM (3.0  $\mu\text{mol}$ ) sodium dithionite and run through a desalting column (GE) to separate excess dithionite from the deoxy-Mb stock solution. Note that sodium phosphate buffer (50 mM, pH 7.4) was degassed before use by vacuum/ $\text{N}_2$  gas several times and bubbled with  $\text{N}_2$  gas overnight in a sealed tube. All samples were prepared in a sealed glove box with constant feed of  $\text{N}_2$  gas.

### Deoxy-Mb Stock Solution Concentration and Stability Test:

To calculate the concentration of deoxy-Mb stock, 100  $\mu\text{L}$  was mixed with sodium phosphate buffer (900  $\mu\text{L}$ ) and the absorbance at 560 nm measured. The exact concentration of Deoxy-Mb in the solution was calculated using absorption peak intensity at 560 nm ( $A_{560\text{nm}} = 0.942$  a.u.,  $\epsilon_{560\text{nm}} =$  extinction coefficient of deoxy-Mb =  $12.92 \text{ mM}^{-1}\text{cm}^{-1}$ ). Calculated concentration of deoxy-Mb was 72.9  $\mu\text{M}$ .

### Myoglobin Assay Procedure:

Deoxy-Mb stock solution (100  $\mu\text{L}$ ) and HMTA-CB (4.0  $\mu\text{mol}$  or 66  $\mu\text{L}$  of 12 mg/mL in sodium phosphate buffer) were mixed with sodium phosphate buffer (834  $\mu\text{L}$ ) and placed in a sealed quartz cuvette. Control sample was set up the same way without HMTA-CB compound. A layer of mineral oil was added on top of the solution to prevent any exposure to oxygen and to prevent CO from escaping. Samples were incubated at 37  $^\circ\text{C}$  in  $\text{N}_2$  Chamber. Formation of carbonmonoxy myoglobin (Mb-CO) was monitored by UV-Vis spectrophotometer (500-600 nm) at 0, 10, 20, 30, 40 and 60 minutes. The calculation for percent CO release is shown on **Table S1**.

**Table S1. Absorption Values from Myoglobin Assay and Calculations for %CO Release.**

| Time (minutes) | $A_{540}$ | $A_{570}$ | $A_{540}$ corrected <sup>1</sup> | $A_{540}$ changes <sup>2</sup> | [Mb-CO] (M) <sup>3</sup> | Mb-CO ( $\mu\text{mol}$ ) <sup>4,5</sup> | % CO <sup>6</sup> |
|----------------|-----------|-----------|----------------------------------|--------------------------------|--------------------------|------------------------------------------|-------------------|
| 0              | 0.7560    | 0.8591    | 0.7560                           | 0.0000                         | 0.0000                   | 0.0000                                   | 0.0000            |
| 10             | 0.8103    | 0.8693    | 0.8008                           | 0.0448                         | 3.017E-06                | 0.0030                                   | 0.0754            |
| 20             | 0.8636    | 0.8604    | 0.8623                           | 0.1063                         | 7.161E-06                | 0.0072                                   | 0.179             |
| 30             | 0.9196    | 0.8606    | 0.9179                           | 0.1619                         | 1.090E-05                | 0.0109                                   | 0.2726            |
| 40             | 0.9632    | 0.8574    | 0.9651                           | 0.2091                         | 1.408E-05                | 0.0141                                   | 0.3521            |
| 60             | 1.0516    | 0.7843    | 1.1518                           | 0.3959                         | 2.666E-05                | 0.0267                                   | 0.6664            |

$$^1 A_{540} \text{ corrected} = (A_{540}) \times (A_{570 \text{ t}=0} / A_{570 \text{ t}=\text{min}})$$

$$^2 A_{540} \text{ changes} = A_{540 \text{ t}=\text{min}} - A_{540 \text{ t}=0}$$

$$^3 [\text{Mb-CO}] = A_{540} \text{ corrected} / ((14850 \text{ M}^{-1}\text{cm}^{-1}) \times (1 \text{ cm})); \epsilon_{540\text{nm}} = \text{extinction coefficient of Mb-CO} \\ \text{CO}^3 = 14.85 \text{ mM}^{-1}\text{cm}^{-1}$$

$$^4 \text{Mb-CO} = [\text{Mb-CO}] \times (1.000 \text{ mL}) \times (1 \text{ L}/1000 \text{ mL}) \times (10^6 \mu\text{L}/1 \text{ L})$$

$$^5 \text{Mb-CO} (\mu\text{mol}) = \text{CO} (\mu\text{mol})$$

$$^6 \% \text{CO} = (\text{CO} (\mu\text{mol}) / 4.00 (\text{HMTA-CB } \mu\text{mol})) \times 100$$

Note:

- Absorption spectrum of Deoxy-Mb sample without HMTA-CB (control sample) does not change over the period of 1 hour of incubation. We assumed that there was no degradation of deoxy-Mb nor the formation of Mb-CO under the controlled experimental condition.

- Mb-CO and deoxy-Mb spectra have four isosbestic points at 510, 550, 570, and 585 nm. The absorption values at 570 nm ( $A_{570}$ ) were used to correct the maximum absorption values of Mb-CO at 540 nm ( $A_{540}$ ).

Calculation: Percent CO released calculated from  $^1\text{H}$  NMR <sup>5</sup>

Scheme 1.  $^1\text{H}$  NMR spectra of HMTA-CB and HMTA with peak assignments

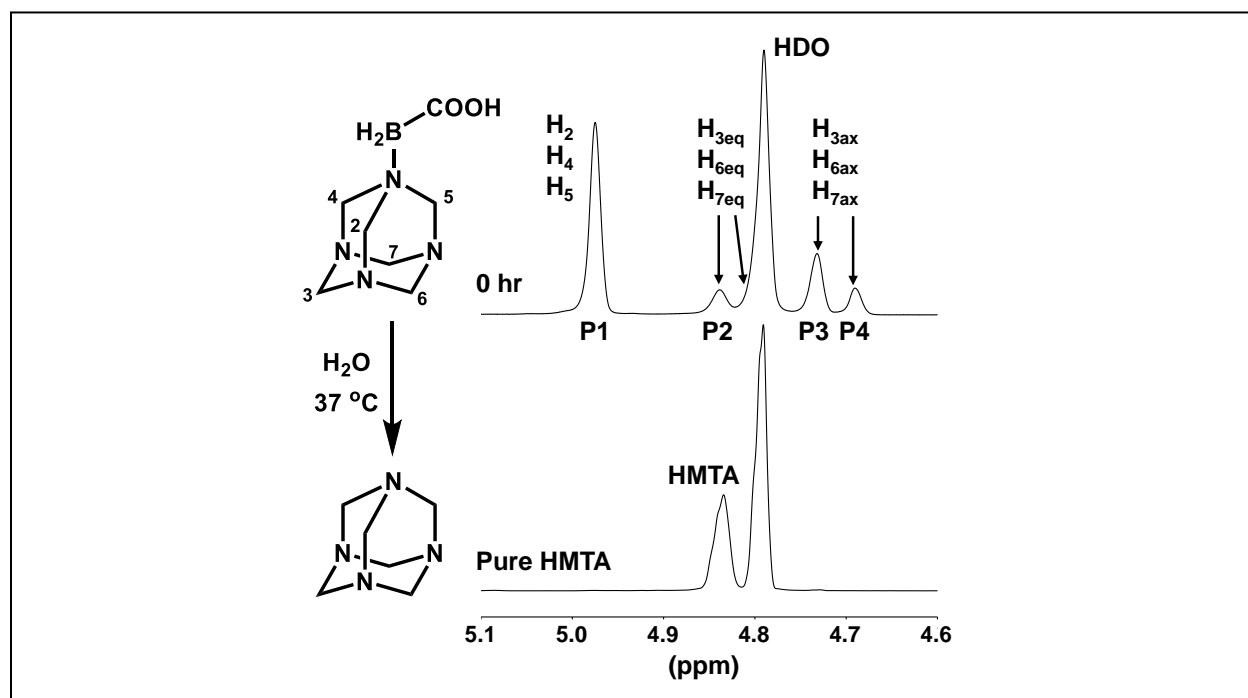

Table S2. Normalized Integrals of HMTA and HMTA-CB peaks from  $^1\text{H}$  NMR spectra and calculations for % decomposition of HMTA-CB.

| Peak                              | Normalized Integrals <sup>a</sup> |        |          |
|-----------------------------------|-----------------------------------|--------|----------|
|                                   | 0 hour                            | 1 hour | 24 hours |
| P1                                | 6.000                             | 6.000  | 6.000    |
| P2                                | 0.969                             | 1.047  | 3.486    |
| P3                                | 2.096                             | 2.160  | 2.139    |
| P4                                | 0.961                             | 0.933  | 0.921    |
| P(HMTA) <sup>b</sup>              | 0 <sup>c</sup>                    | 0.114  | 2.565    |
| % Auto-Decomposition <sup>d</sup> | 0 <sup>c</sup>                    | 0.9268 | 17.467   |

<sup>a</sup> NMR spectra were processed by using Mnova program.

<sup>b</sup> P(HMTA) = P2-P4

<sup>c</sup> We assume that HMTA is not present at 0 hour and 1 mole of HMTA-CB gives 1 mole of CO.

<sup>d</sup> % Auto-Decomposition =  $(P(\text{HMTA}) / (P1 + 2 \times (P3 + P4))) \times 100$

Calculation: Percent CO released calculated from meter reading <sup>5</sup>

Table S3. Conversion of ppm to % CO released by auto-decomposition of HMTA-CB

| Sample <sup>a</sup> Incubation Time (hours) | CO-Meter Reading (ppm) <sup>b</sup> | mol% CO Released <sup>c</sup> |
|---------------------------------------------|-------------------------------------|-------------------------------|
| 1                                           | 22                                  | 1.15                          |
| 3                                           | 96                                  | 5.01                          |
| 6                                           | 163                                 | 8.51                          |
| 9                                           | 199                                 | 10.39                         |
| 12                                          | 227                                 | 11.86                         |
| 14                                          | 253                                 | 13.21                         |
| 24                                          | 434                                 | 22.67                         |

<sup>a</sup> 4.0  $\mu\text{mol}$  of 60 mM solution was used for each trial in this experiment

<sup>b</sup> Averages from triplicates or more trials

<sup>c</sup> Example calculation for the first hour

1 ppm CO = 1.17  $\mu\text{g}/\text{L}$

Solubility of CO in water at 37 °C is 20  $\mu\text{g}/\text{mL}$ , however it was ignored since the volume of the solution used (66  $\mu\text{L}$ ) was too small to make a difference in the results.

Convert ppm in 50 mL head space to  $\mu\text{g}$ : (22 ppm) \* [(1.17  $\mu\text{g}/\text{L}$ ) / 1 ppm] \* (0.050 L) = 1.29  $\mu\text{g}$

Converting  $\mu\text{g}$  to mol: (1.29  $\mu\text{g}$ ) \* (1 mol / 28 g) = 0.046  $\mu\text{mol}$

mol% = (0.046  $\mu\text{mol}/4 \mu\text{mol}$ )\*100 = 1.15 mol%

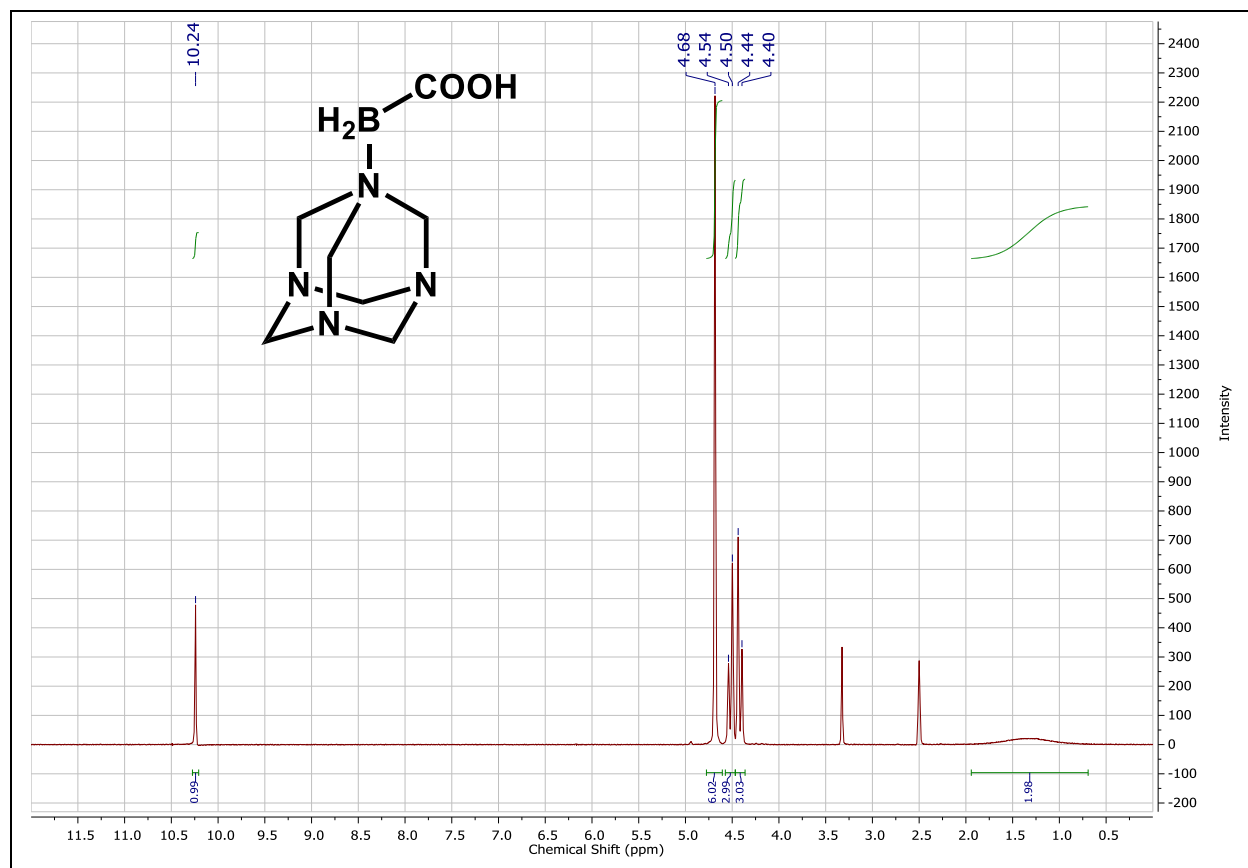

**Figure S1.**  $^1\text{H}$  NMR of HMTA-CB in DMSO.

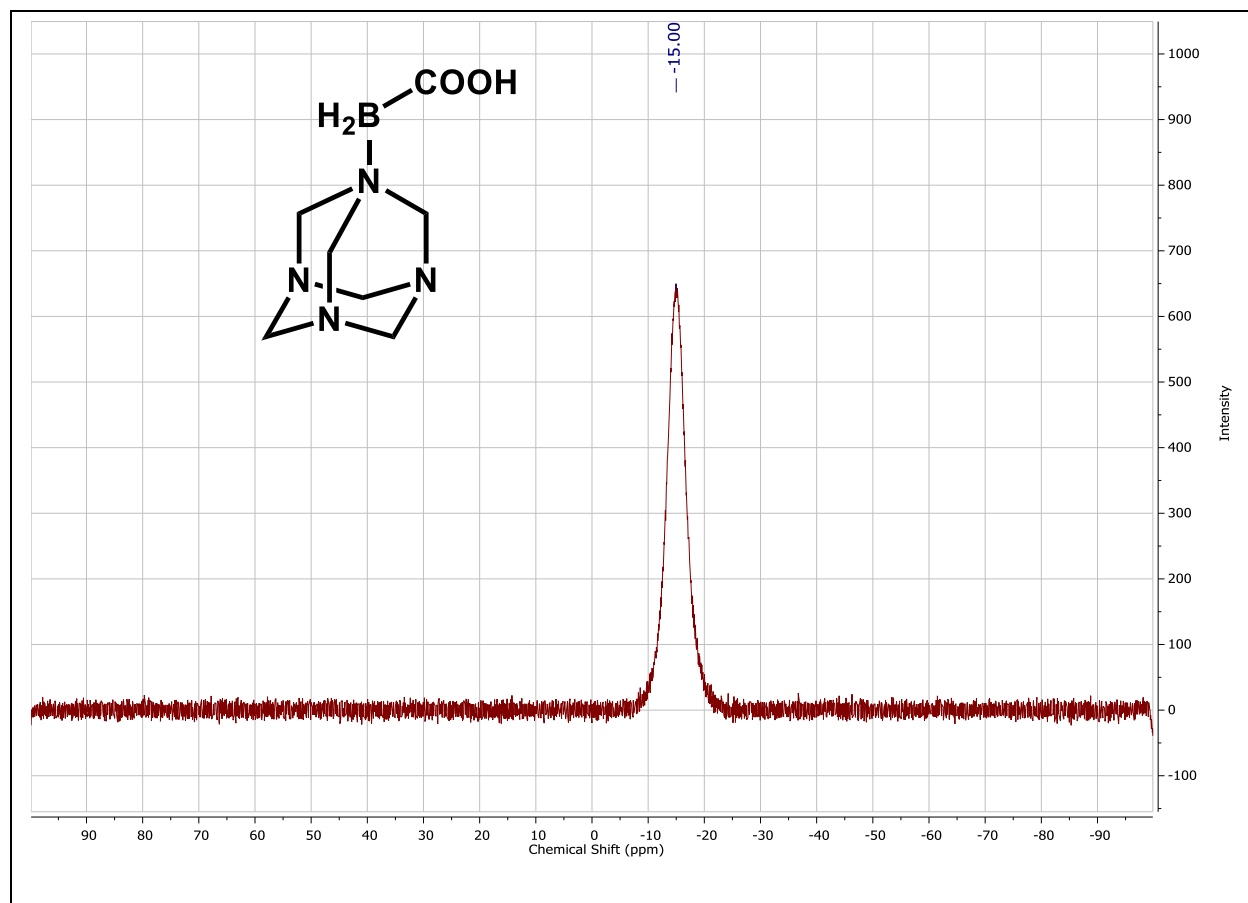

**Figure S2.**  $^{11}\text{B}$  NMR of HMTA-CB in DMSO.

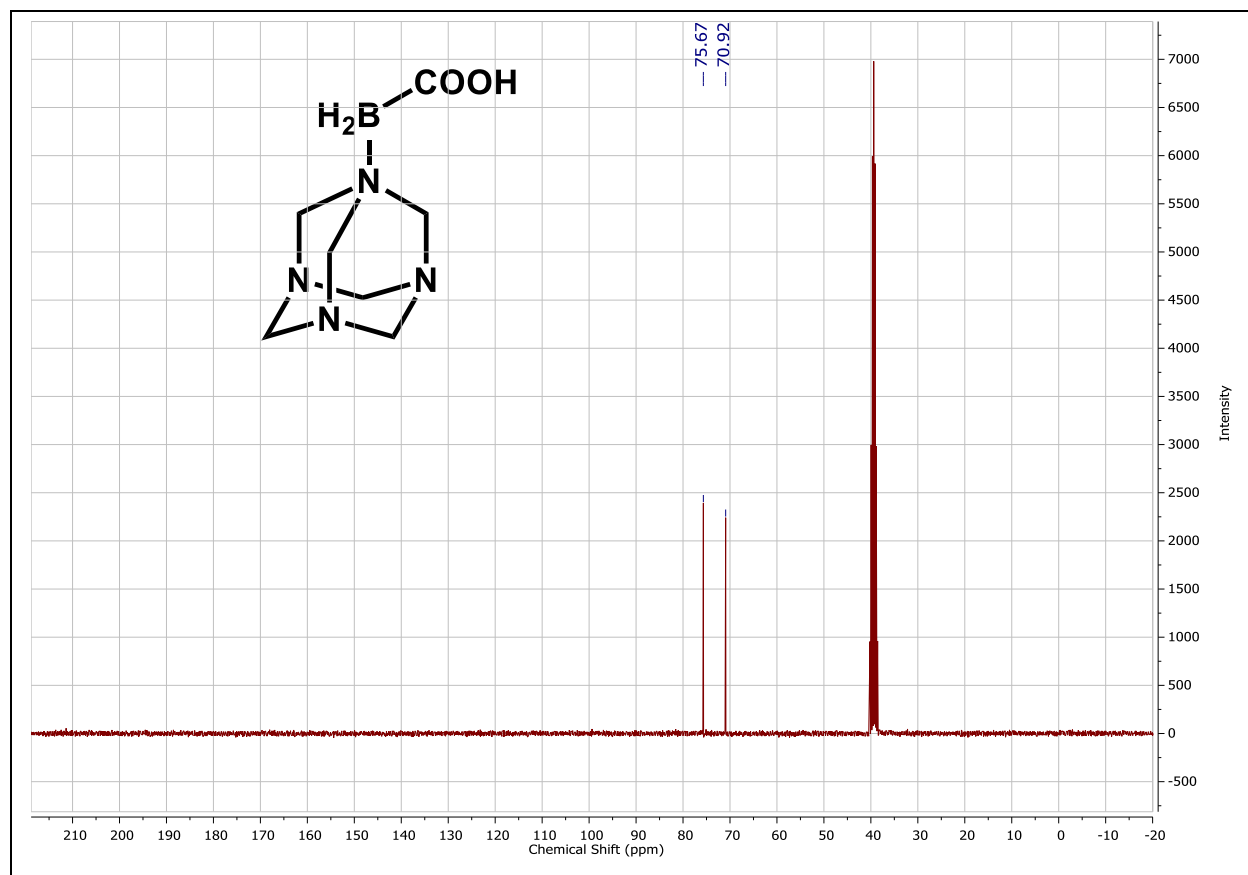

**Figure S3.**  $^{13}\text{C}$  NMR of HMTA-CB in DMSO.



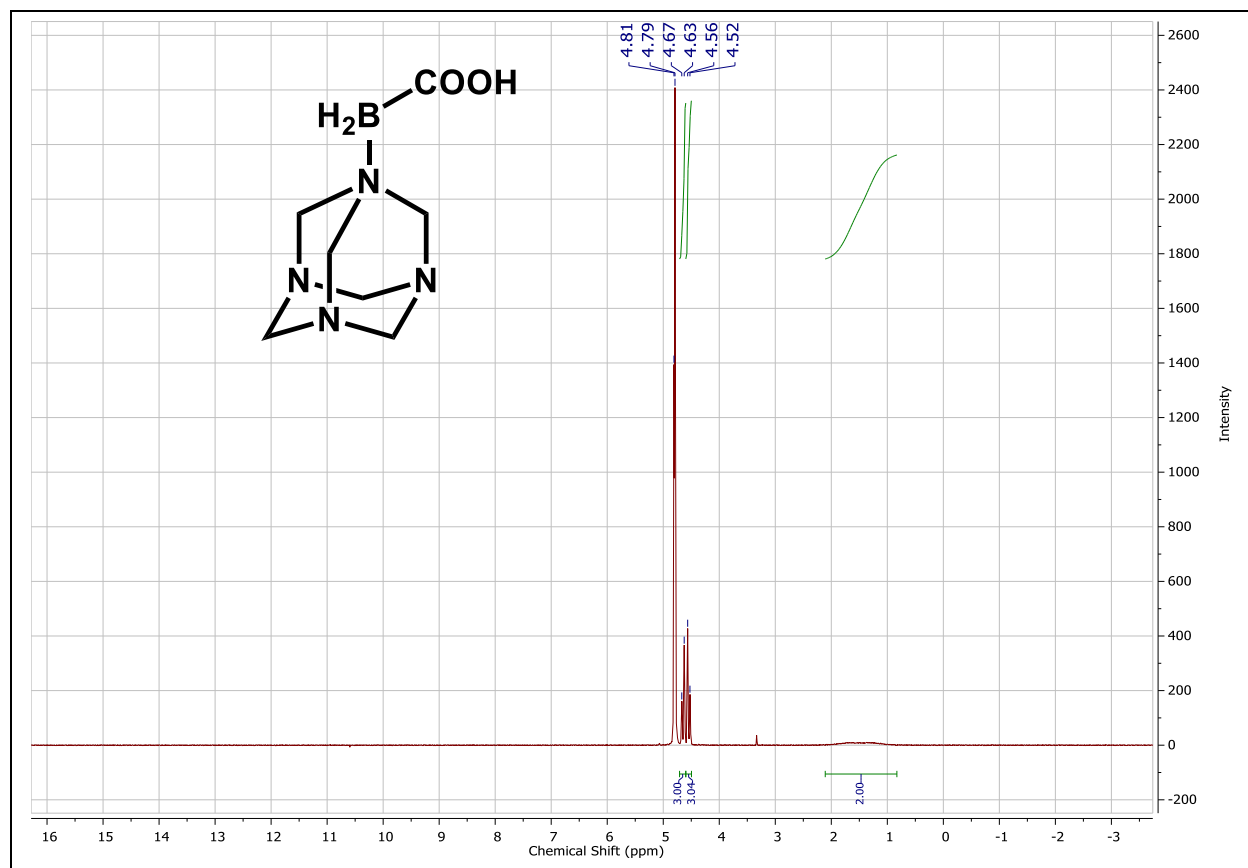

**Figure S4.**  $^1\text{H}$  NMR of HMTA-CB in  $\text{D}_2\text{O}$ .

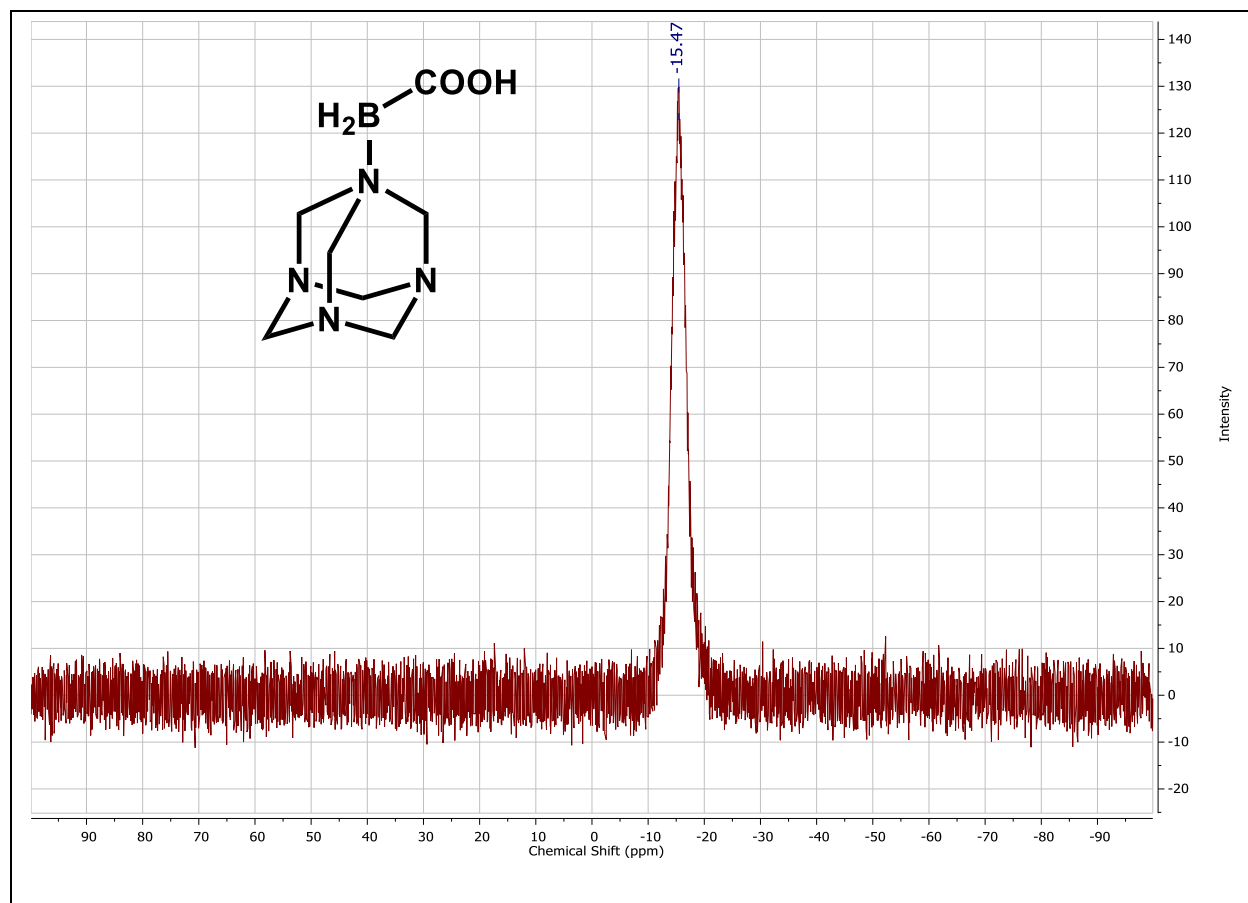

**Figure S5.**  $^{11}\text{B}$  NMR of HMTA-CB in  $\text{D}_2\text{O}$ .

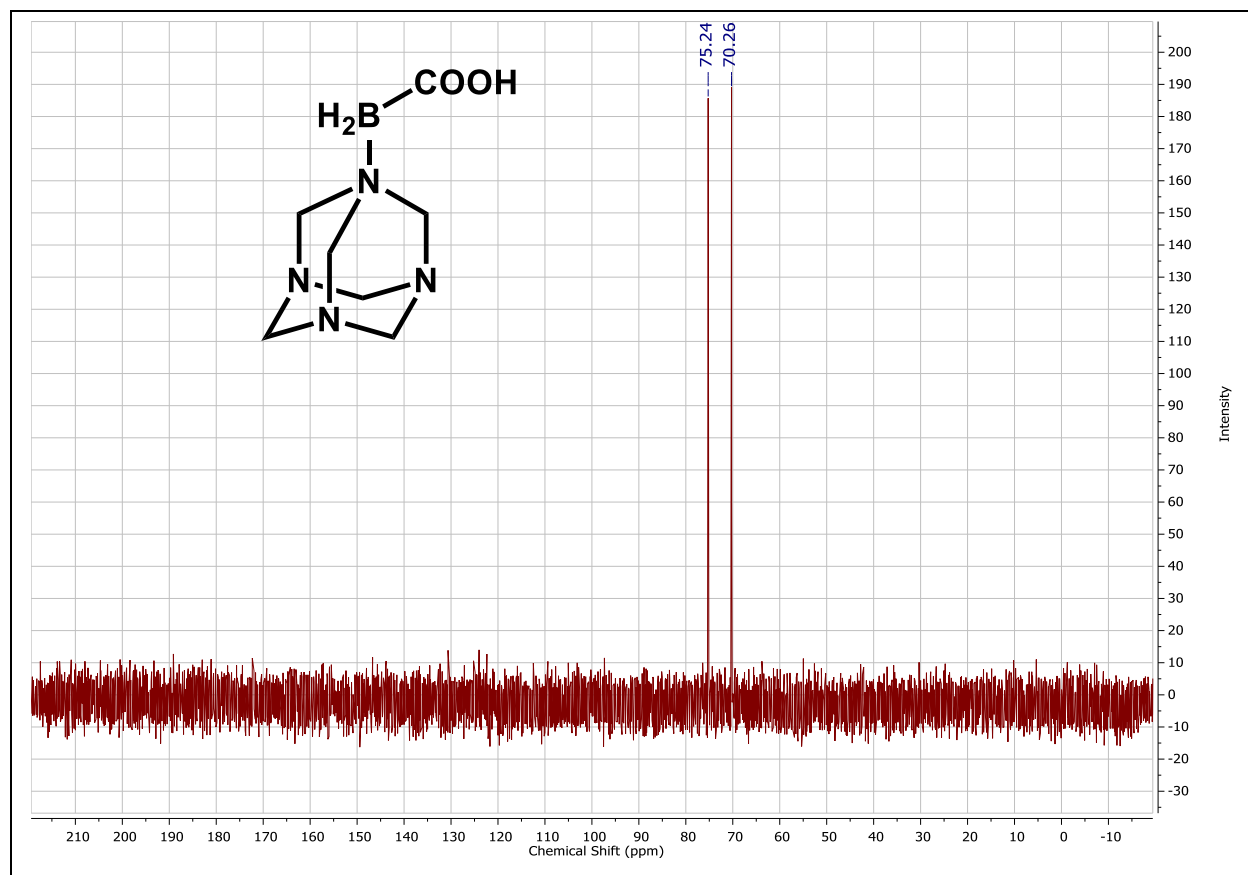

**Figure S6.**  $^{13}\text{C}$  NMR of HMTA-CB in  $\text{D}_2\text{O}$ .

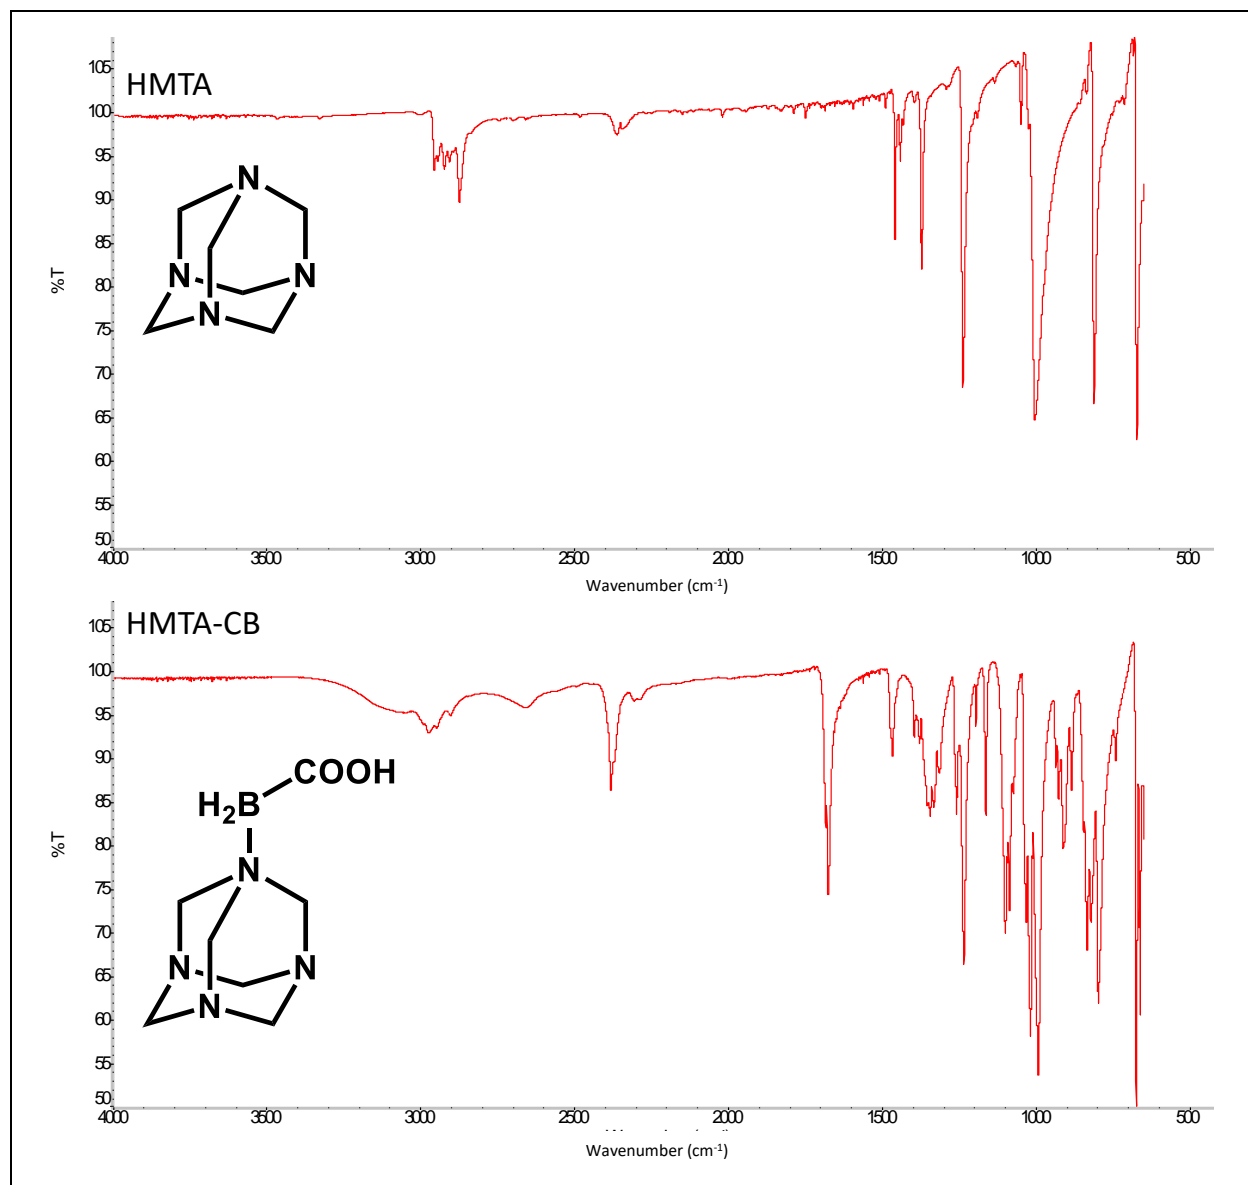

**Figure S7.** IR spectra of HMTA and HMTA-CB for comparison.

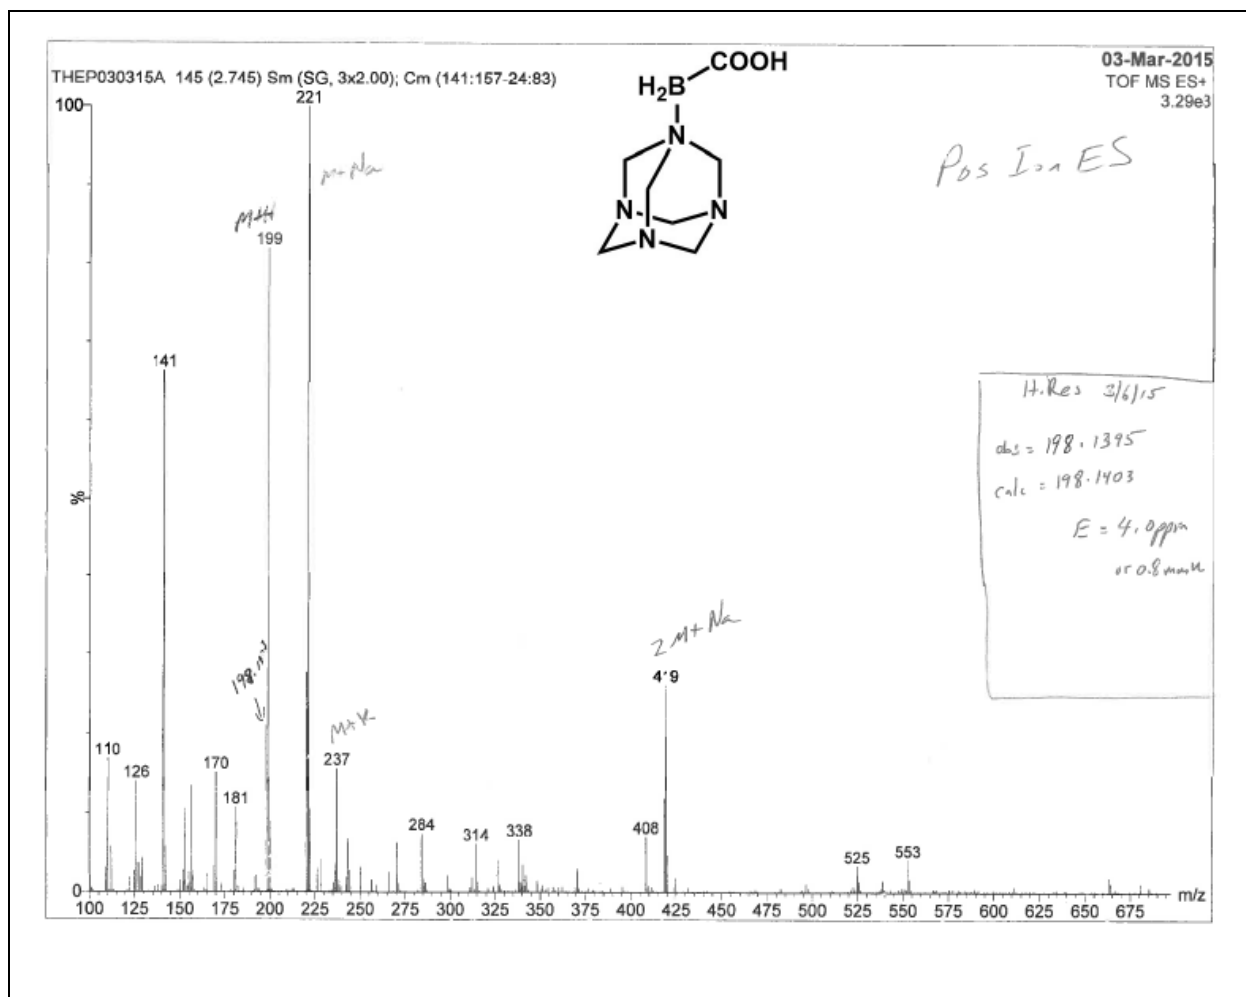

**Figure S8.** High Resolution Mass Spectrum of HMTA-CB.

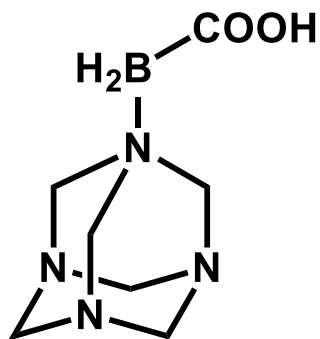

Chemical Formula: C<sub>7</sub>H<sub>15</sub>BN<sub>4</sub>O<sub>2</sub>

Exact Mass: 198.13

Molecular Weight: 198.03

m/z: 198.13 (100.0%), 197.13 (24.8%), 199.13 (9.1%), 198.14 (1.9%)

**Elemental Analysis: C, 42.46; H, 7.63; B, 5.46; N, 28.29; O, 16.16**

**Table S4.** HMTA-CB Elemental Analysis

| Elements | Calculated | Run #1 | Run #2 | Average | % Error  |
|----------|------------|--------|--------|---------|----------|
| C        | 42.46      | 42.64  | 42.63  | 42.635  | 0.412153 |
| H        | 7.63       | 7.66   | 7.65   | 7.655   | 0.327654 |
| N        | 28.29      | 28.27  | 28.38  | 28.325  | 0.123719 |

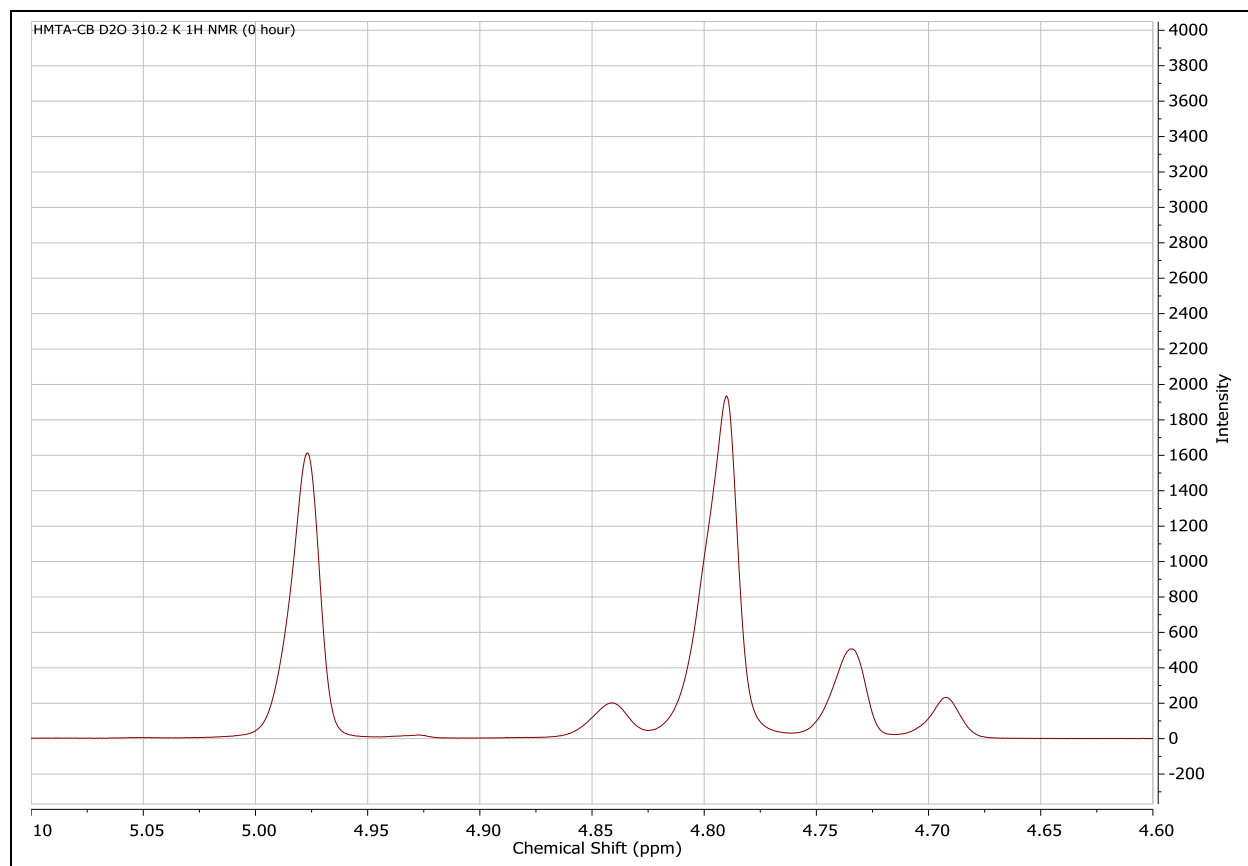

**Figure S9.** Decomposition of HMTA-CB monitored by  $^1\text{H}$  NMR at 0 hour. HMTA-CB was dissolved in  $\text{D}_2\text{O}$  at 12 mg/mL concentration and incubated at 37 °C. Spectra were recorded at specified times. Solvent DHO at 4.79 ppm overlaps with one of the peaks from sample.

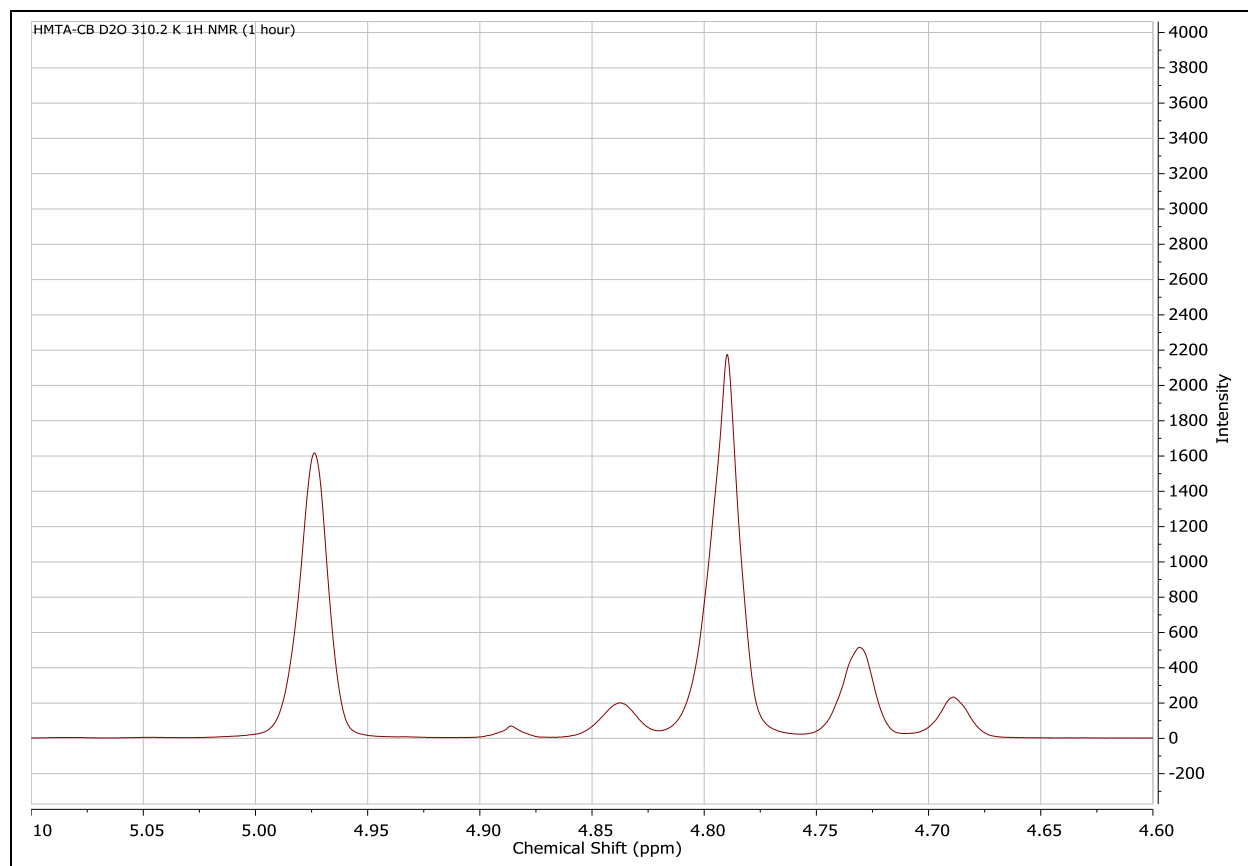

**Figure S10.** Decomposition of HMTA-CB monitored by  $^1\text{H}$  NMR at 1 hour. HMTA-CB in  $\text{D}_2\text{O}$  at  $37\text{ }^\circ\text{C}$ . Solvent DHO at 4.79 ppm overlaps with one of the peaks from sample. A new peak emerges at 4.88 ppm.



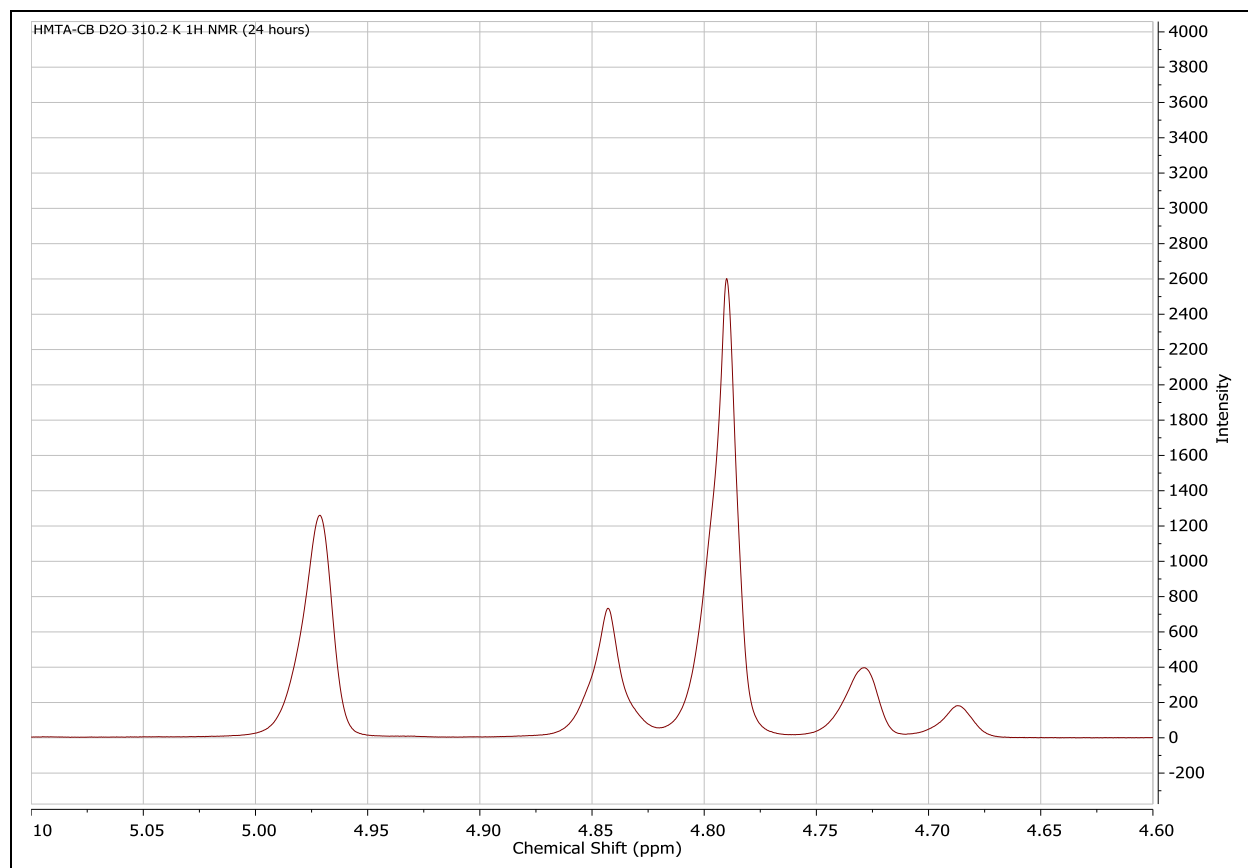

**Figure S11.** Decomposition of HMTA-CB monitored by  $^1\text{H}$  NMR at 24 hour. HMTA-CB in  $\text{D}_2\text{O}$  at  $37\text{ }^\circ\text{C}$ . The new peak corresponding to the HMTA protons is now shifted to 4.84 ppm and merged with one of the peaks from HMTA-CB. For accurate estimation of the ratio, a small peak area from the far right is subtracted from the new peak.

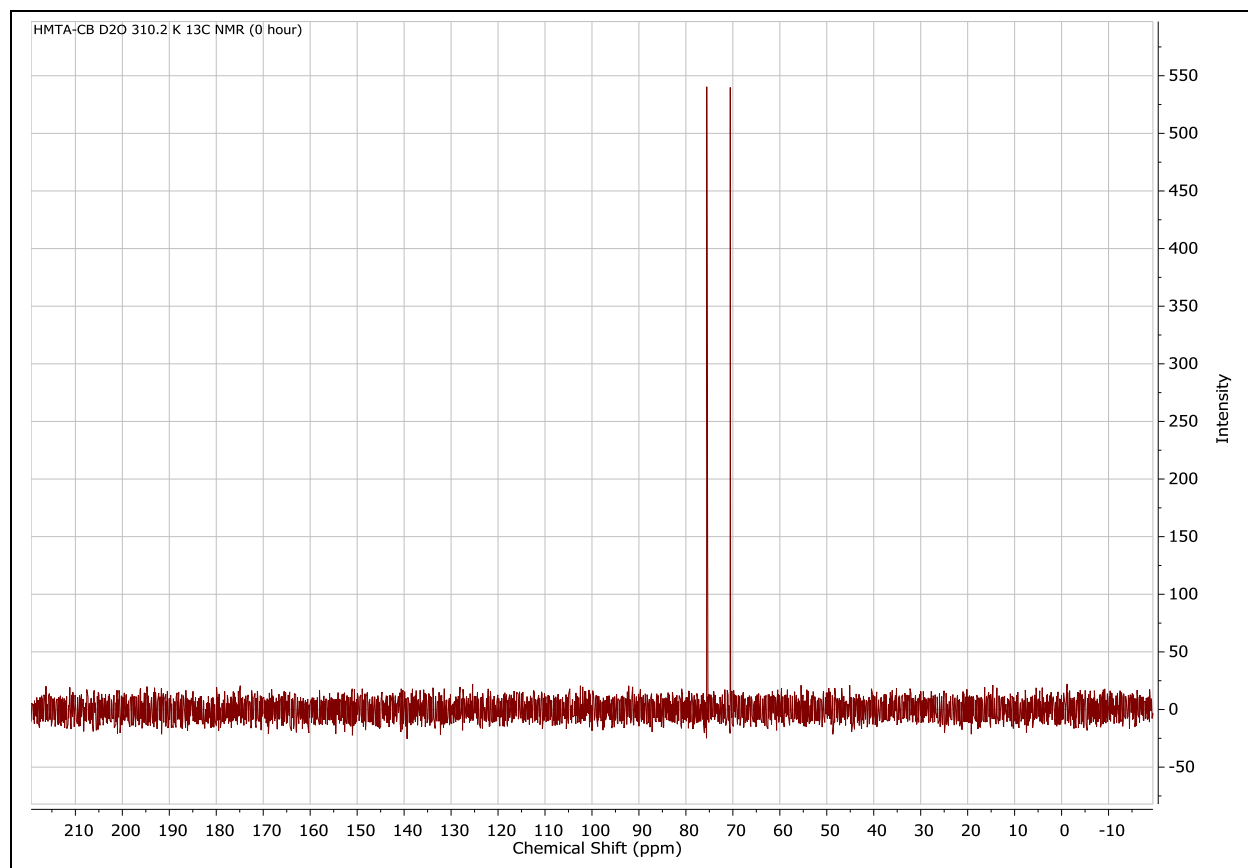

**Figure S12.** Decomposition of HMTA-CB monitored by <sup>13</sup>C NMR at 0 hour. HMTA-CB was dissolved in D<sub>2</sub>O at 12 mg/mL concentration and incubated at 37 °C. Spectra were recorded at specified times.

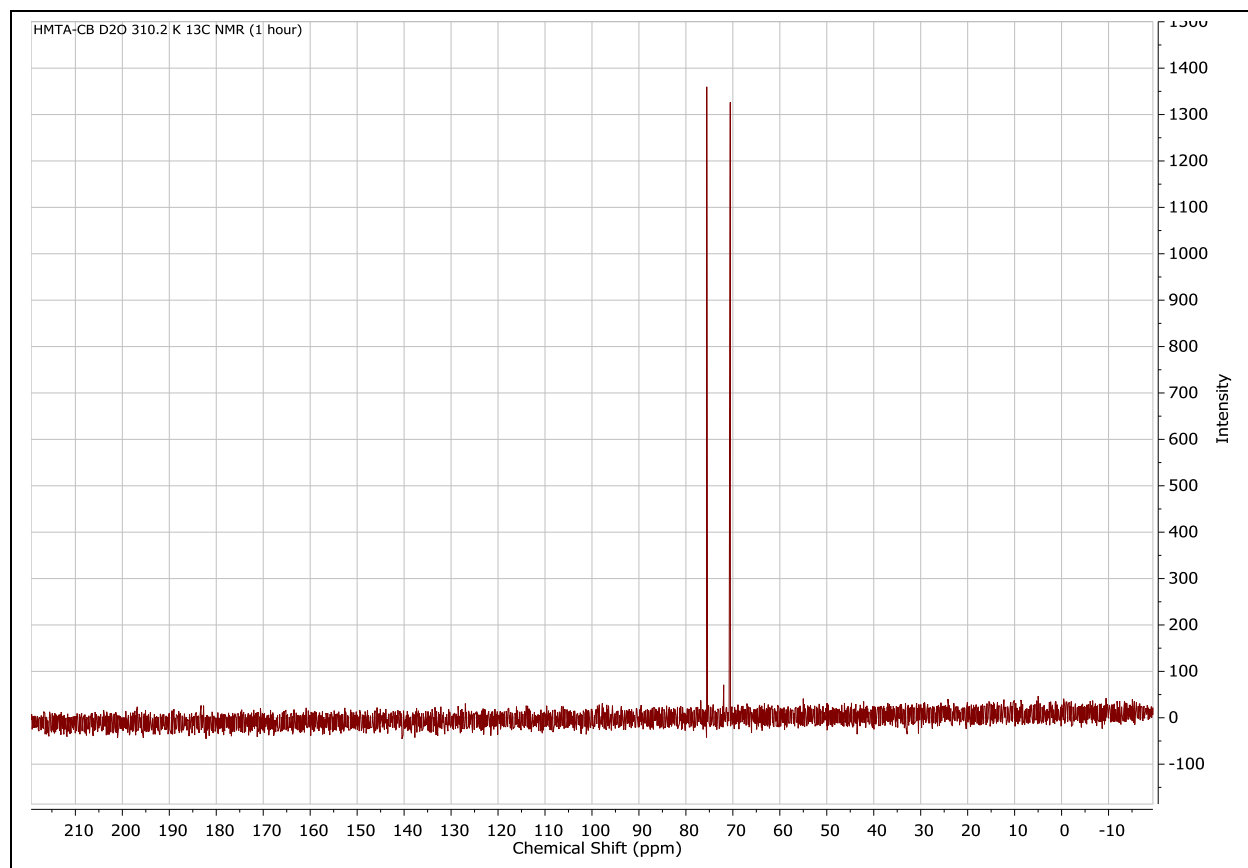

**Figure S13.** Decomposition of HMTA-CB monitored by  $^{13}\text{C}$  NMR at 1 hour. HMTA-CB in  $\text{D}_2\text{O}$  at  $37\text{ }^\circ\text{C}$ . The presence of free HMTA was determined by the appearance of a singlet peak at 72.00 ppm.

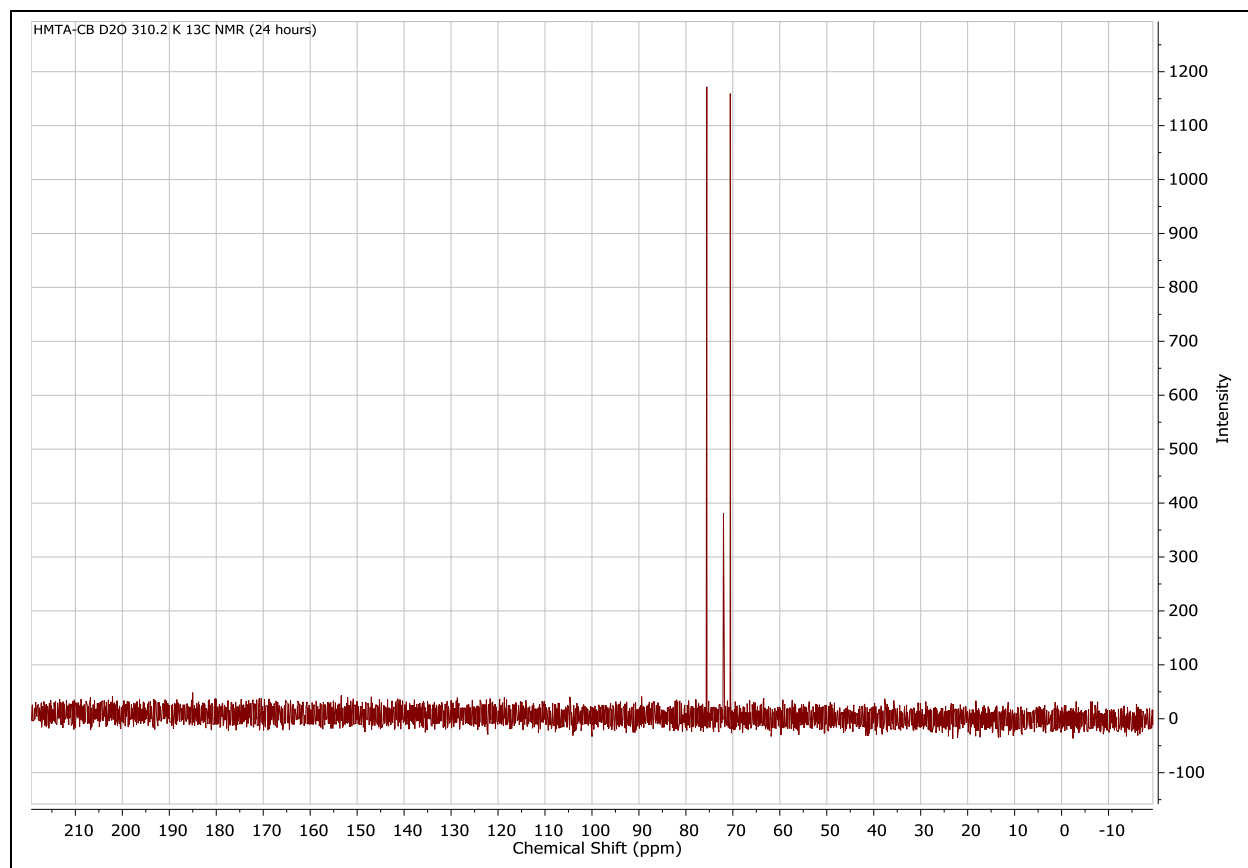

**Figure S14.** Decomposition of HMTA-CB monitored by  $^{13}\text{C}$  NMR at 24 hour. HMTA-CB in  $\text{D}_2\text{O}$  at  $37^\circ\text{C}$ . HMTA peak at 72.00 ppm gets taller with time.

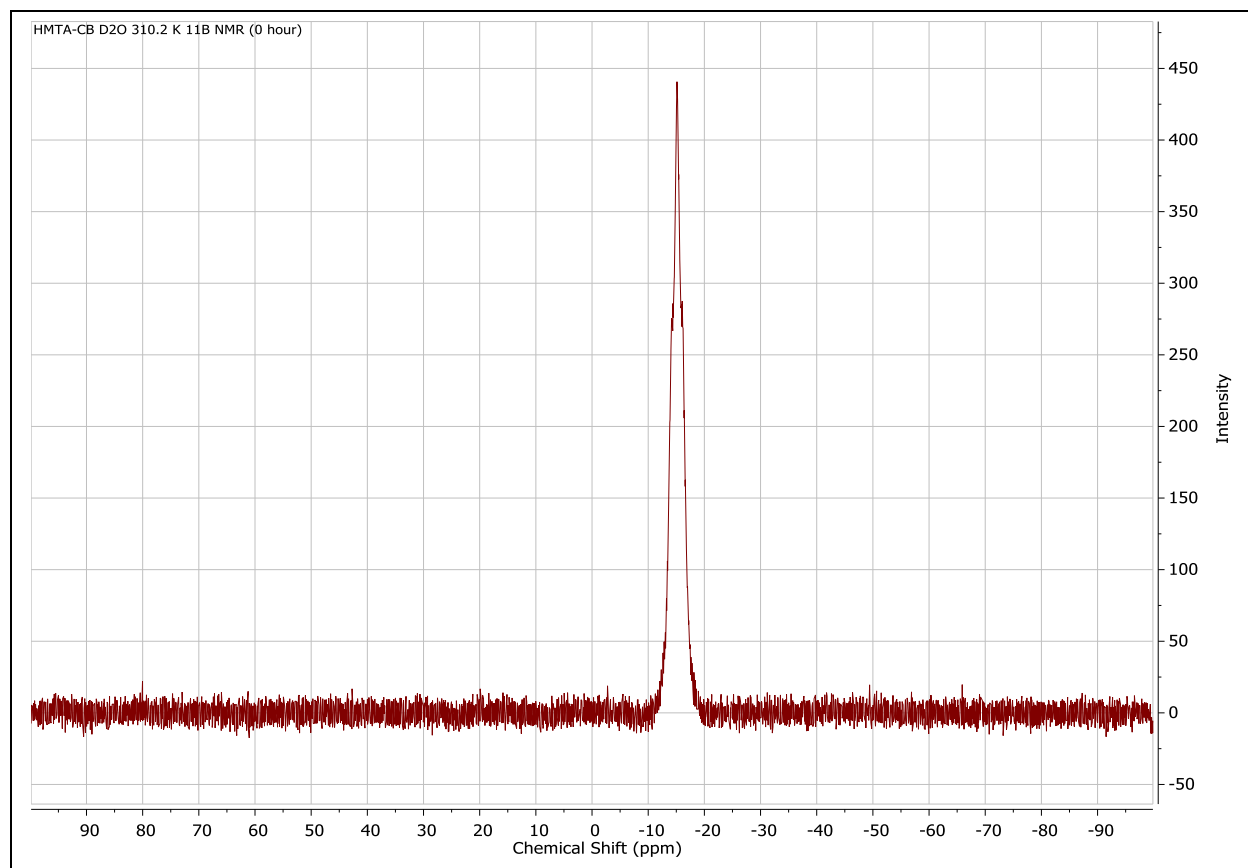

**Figure S15.** Decomposition of HMTA-CB monitored by  $^{11}\text{B}$  NMR at 0 hour. HMTA-CB was dissolved in  $\text{D}_2\text{O}$  at 12 mg/mL concentration and incubated at 37 °C. Spectra were recorded at specified times.

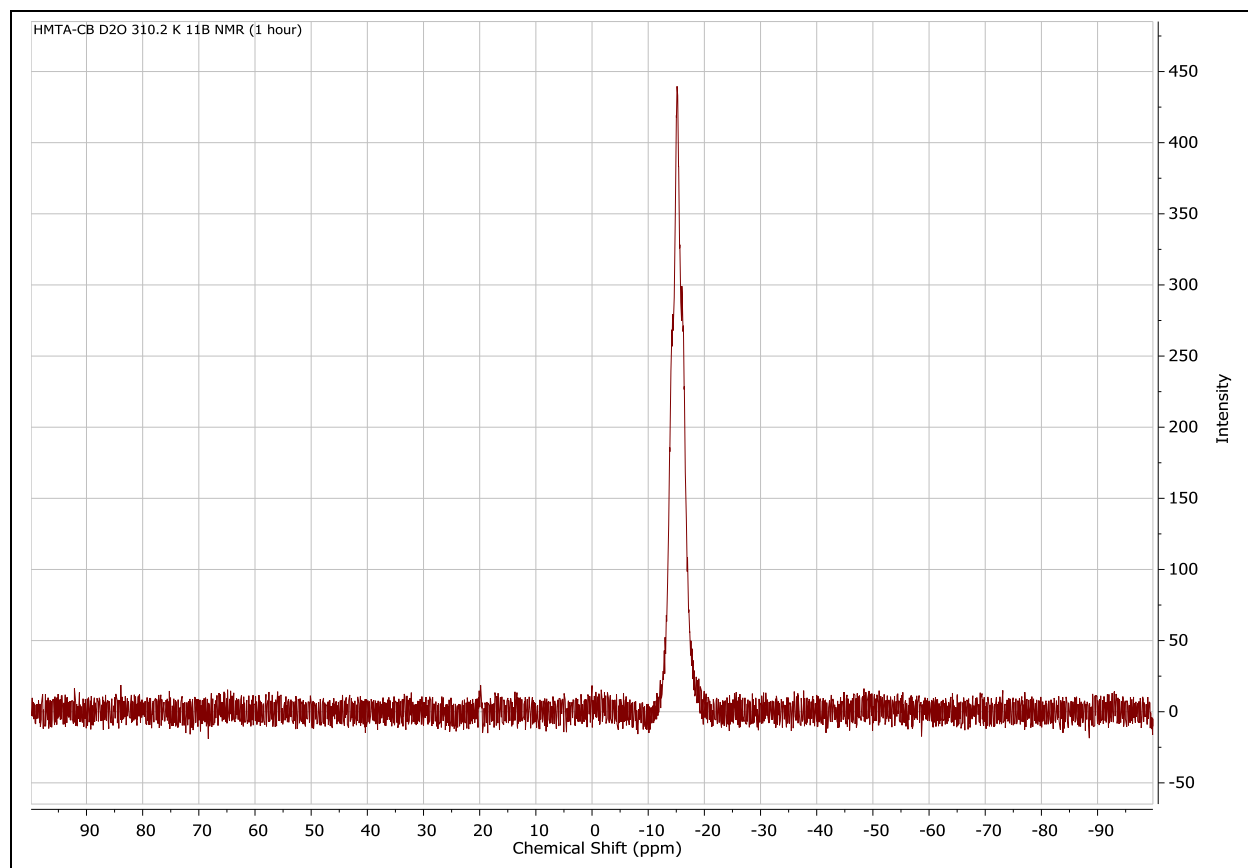

**Figure S16.** Decomposition of HMTA-CB monitored by  $^{11}\text{B}$  NMR at 1 hour. HMTA-CB in  $\text{D}_2\text{O}$  at  $37\text{ }^\circ\text{C}$ . The boron atom on HMTA-CB is a triplet at  $-15.47\text{ ppm}$  in  $\text{D}_2\text{O}$  while the product of decomposition, boric acid, shows a weak singlet at  $19.54\text{ ppm}$ .

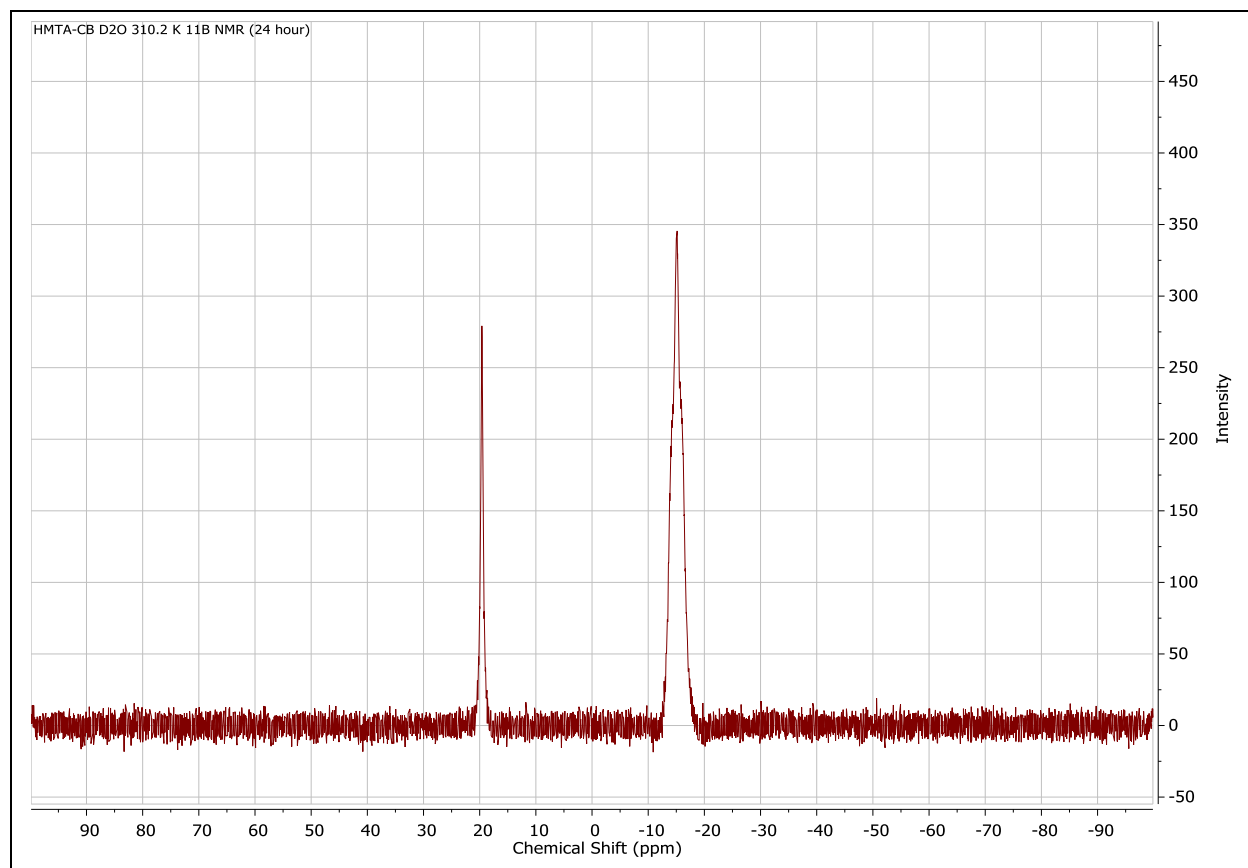

**Figure S17.** Decomposition of HMTA-CB monitored by  $^{11}\text{B}$  NMR at 24 hour. HMTA-CB in  $\text{D}_2\text{O}$  at  $37^\circ\text{C}$ . Boric acid peak at 19.54 ppm gets taller with time.

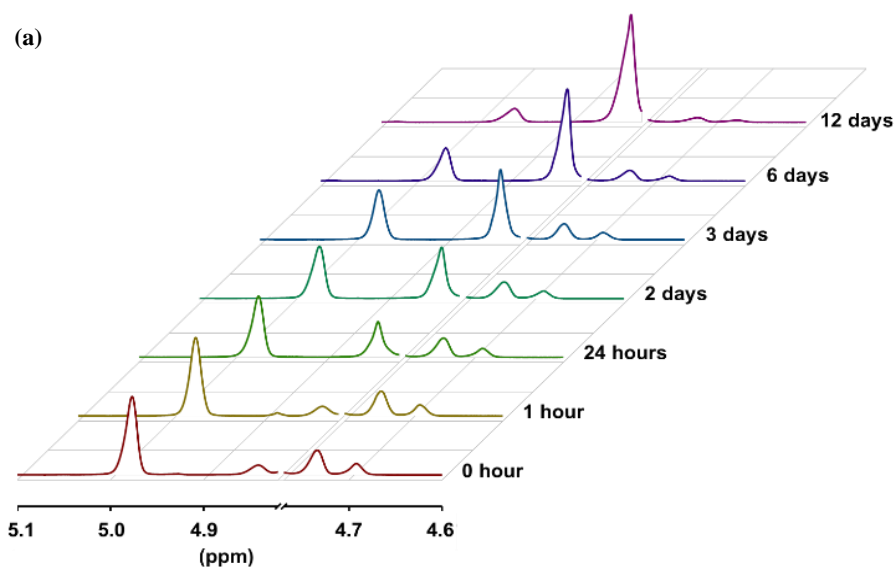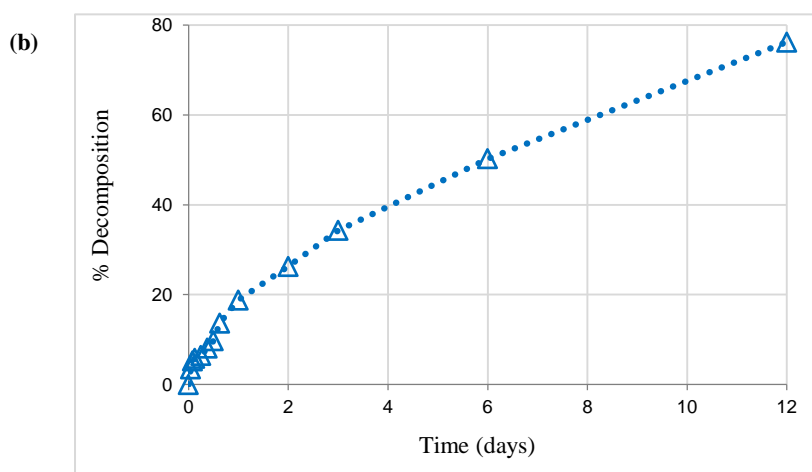

**Figure S18.** Percent decomposition determined by peak integration of  $^1\text{H}$  NMR over a period of 12 days. 60 mM HMTA-CB solution in  $\text{D}_2\text{O}$  was incubated at  $37^\circ\text{C}$  and the spectra taken at specified times. (a) Overlaid  $^1\text{H}$  NMR spectra taken at 0, 1, 2, 3, 6, and 12 days. Disappearance of HMTA-CB peaks at 4.97, 4.73, and 4.69 ppm is compared with the appearance of HMTA peak at 4.84 ppm. Note: HDO peak at  $\delta$  4.79 ppm is removed from stacked spectra for clearer view of the peaks. (b) Kinetics of CO release process monitored by  $^1\text{H}$  NMR. Integrated ratios of the protons are used for calculating percent decomposition.



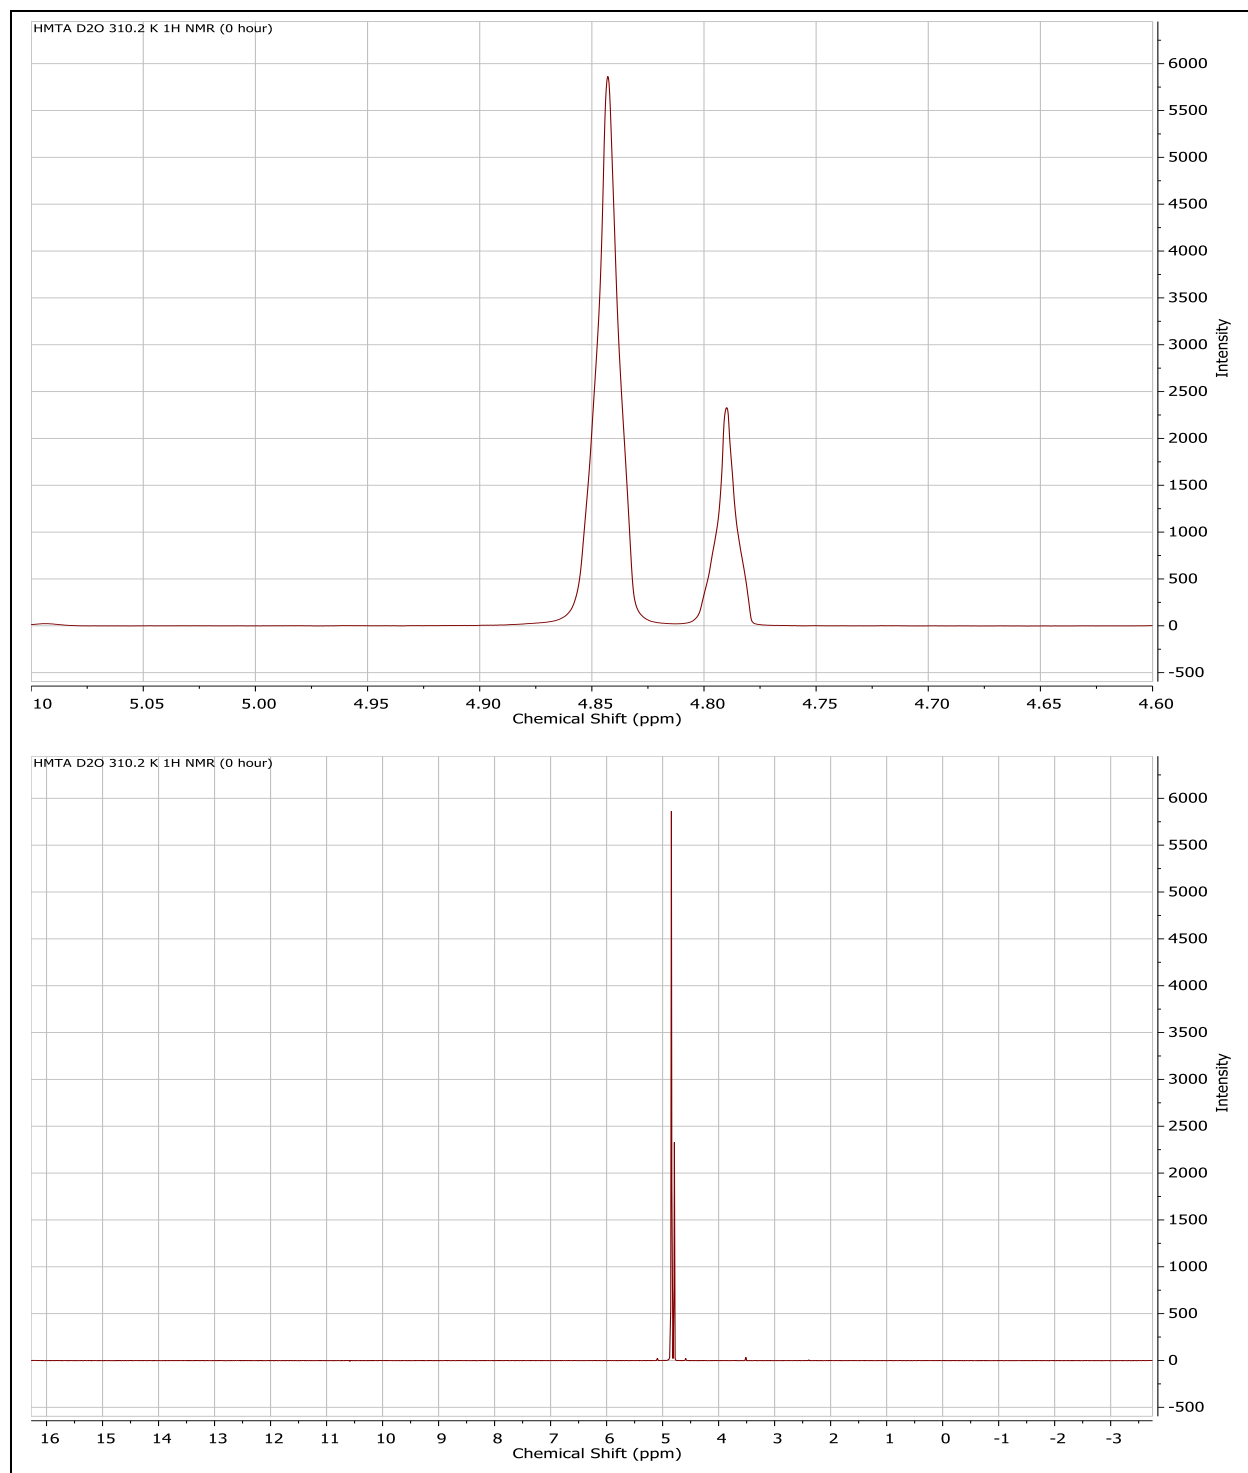

**Figure S19.** Stability test of HMTA monitored by  $^1\text{H}$  NMR at 0 hour. HMTA was dissolved in  $\text{D}_2\text{O}$  at 12 mg/mL concentration and incubated at 37 °C. The solvent, DHO, peak shows at 4.79 ppm (top).

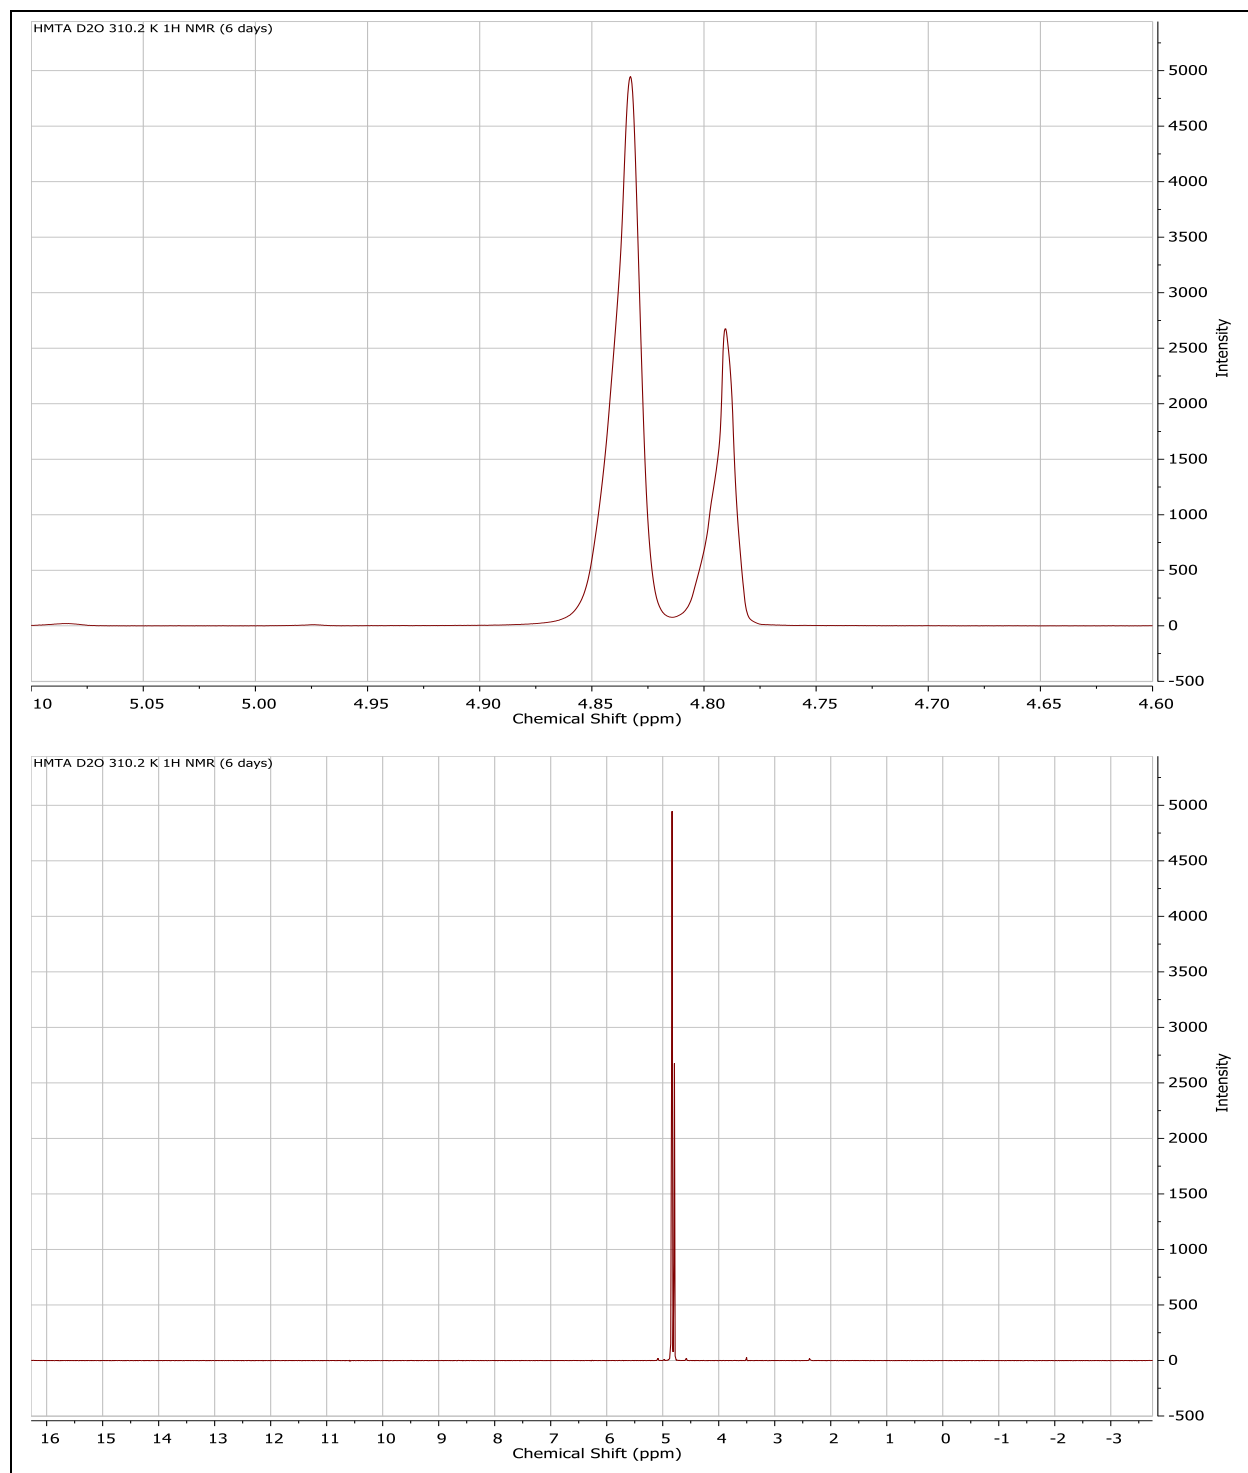

**Figure S20.** Stability test of HMTA monitored by  $^1\text{H}$  NMR at 6 days. The solvent, DHO, peak shows at 4.79 ppm (top). No new peaks are observed on the spectrum (bottom).

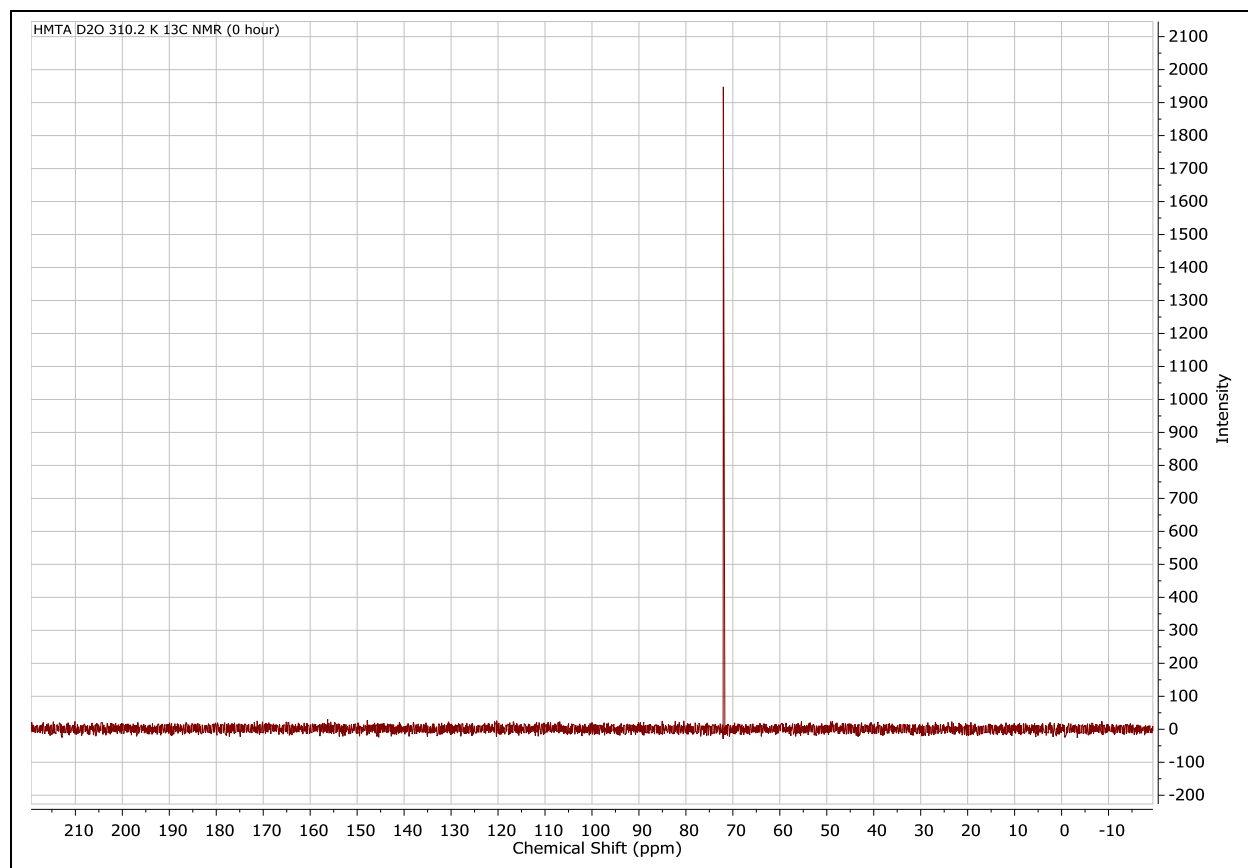

**Figure S21.** Stability test of HMTA monitored by <sup>13</sup>C NMR at 0 hour. HMTA was dissolved in D<sub>2</sub>O at 12 mg/mL concentration and incubated at 37 °C. A single peak corresponding to 6 equivalent carbons of HMTA is shown at 72.00 ppm.

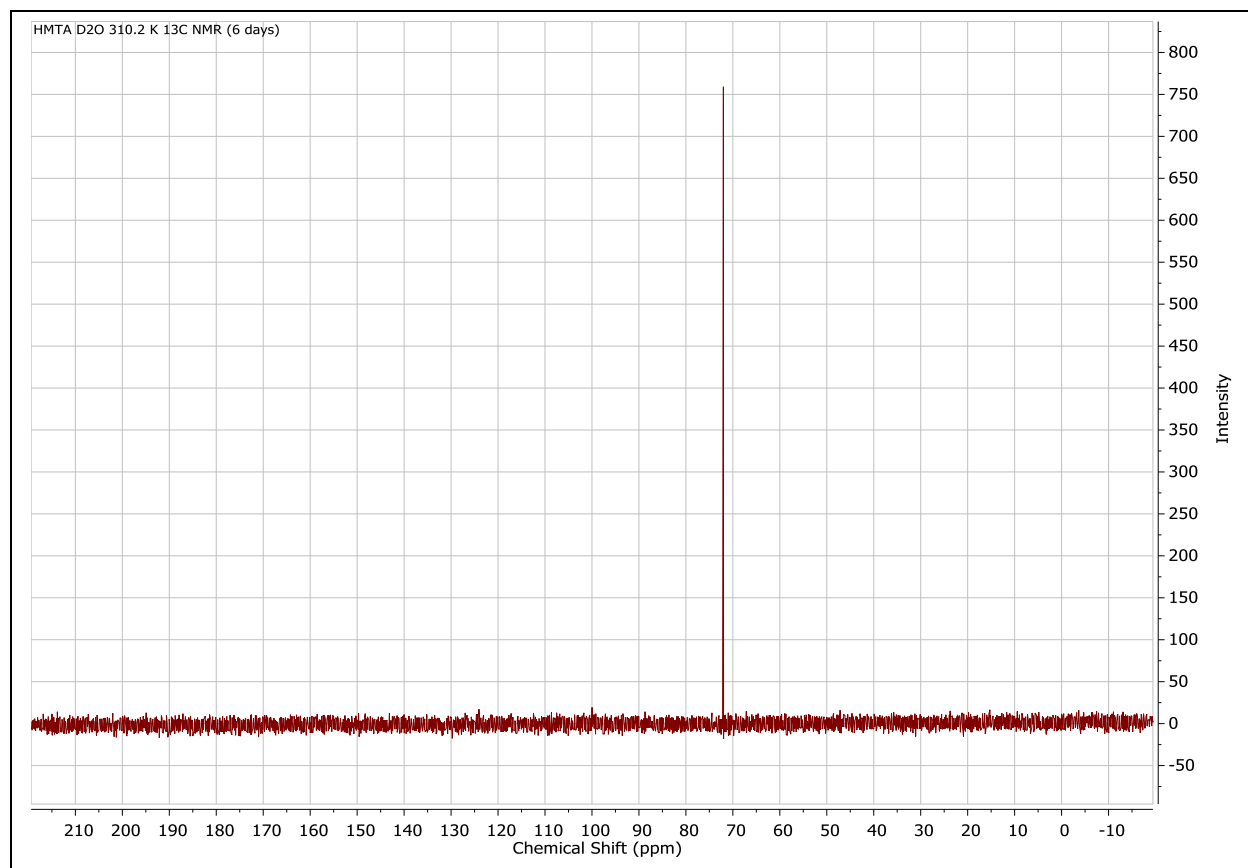

**Figure S22.** Stability test of HMTA monitored by  $^{13}\text{C}$  NMR at 6 days. No new peaks are observed on the spectrum.
